# Supplementary material for: Discovery of hCES2A inhibitors from Glycyrrhiza inflata via combination of docking-based virtual screening and fluorescence-based inhibition assays
Source: Royal Society of Chemistry journal article supplement (doi:10.1039/d0fo02140g), 2020-11-18

## Supplementary Materials

*for*

### **Discovery of hCES2A inhibitors from *Glycyrrhizae Inflatae* via combination of docking-based virtual screening and florescence-based inhibition assays**

Yun-Qing Song <sup>a,1</sup>, Xiao-Qing Guan <sup>a,1</sup>, Zi-Miao Weng <sup>b,1</sup>, Jun-Ling Liu <sup>a</sup>, Jing Chen <sup>a</sup>, Lu Wang <sup>a</sup>, Long-Tao Cui <sup>c</sup>, Sheng-Quan Fang <sup>d</sup>, Jie Hou <sup>b,\*</sup>, Guang-Bo Ge <sup>a,d\*</sup>

<sup>a</sup> Institute of Interdisciplinary Integrative Medicine Research, Shanghai University of Traditional Chinese Medicine, Shanghai, 201203, China.

<sup>b</sup> Department of Biotechnology, College of Basic Medical Sciences, Dalian Medical University, Dalian 116044, China.

<sup>c</sup> Basic Medical College, Shanghai University of Traditional Chinese Medicine, Shanghai, 201203, China.

<sup>d</sup> Yueyang Hospital of Integrated Traditional Chinese and Western Medicine, Shanghai University of Traditional Chinese Medicine, Shanghai, 200473, China.

\*Corresponding author.

E-mail address: geguangbo@dicp.ac.cn (G.-B. Ge); houjie@dlmedu.edu.cn (J. Hou)

<sup>1</sup> These authors contributed equally to this work.

## Contents

**Fig. S1** The dose-inhibition curves for Glycyrrhizae Inflatae (granules) against hCES2A-mediated FD hydrolysis (A) and hCES1A-mediated DME hydrolysis in HLM (B).

**Fig. S2** Total ion chromatograph of *Glycyrrhizae Inflatae* granule in negative ion mode.

**Fig. S3** The dose-inhibition curves of Isoliquiritigenin (A), Licochalcone B (B), Echinatin (C), Naringenin (D), Gancaonin I (E), Licoflavonol (F), Glycy coumarin (G) and Loperamide (H) against hCES2A-mediated FD hydrolysis.

**Fig. S4** Time-dependent inhibition assays of Licochalcone A (A), Licochalcone C (B), Licochalcone D (C) and Isolicoflavonol (D) on hCES2A using FD as the substrate.

**Fig. S5** The inhibition kinetic plots of Licochalcone A (A), Licochalcone C (B), Licochalcone D (C) and Isolicoflavonol (D) on hCES2A using FD as the substrate.

**Fig. S6** Dose-inhibition curve of Licochalcone C against intracellular hCES2A in living HepG2 cells.

**Fig. S7** Dose-inhibition curves of nevadensin against hCES1A-mediated DME hydrolysis in HLM.

**Fig. S8** Cytotoxicity assay of Licochalcone A (A), Licochalcone C (B), Licochalcone D (C) and Isolicoflavonol (D) in HepG2 cells.

**Table S1.** The predicted binding energy and CDOCKER interaction energy values of 53 constituents from licorice and Loperamide.

**Table S2.** AutoDock vina results of Licochalcone C docked with hCES2A.

**S1** The ethics policy statement and product report provided by BioreclamationIVT.

**S2** Gene test report of HepG2 cells used in this study.

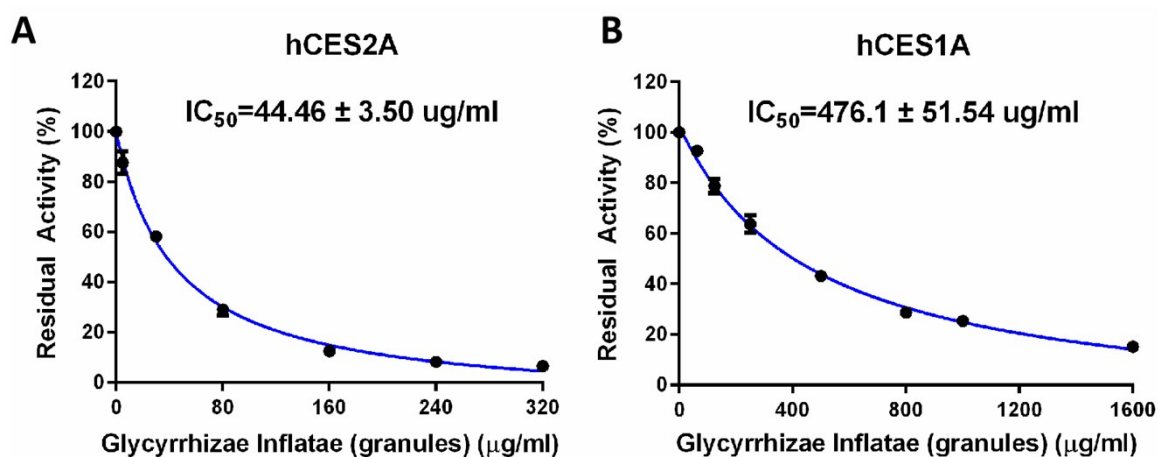

**Fig. S1** The dose-inhibition curves for *Glycyrrhizae Inflatae* (granules) against hCES2A-mediated FD hydrolysis in HLM (**A**) and hCES1A-mediated DME hydrolysis in HLM (**B**).

All data were shown as mean  $\pm$  SD of triplicate assays.

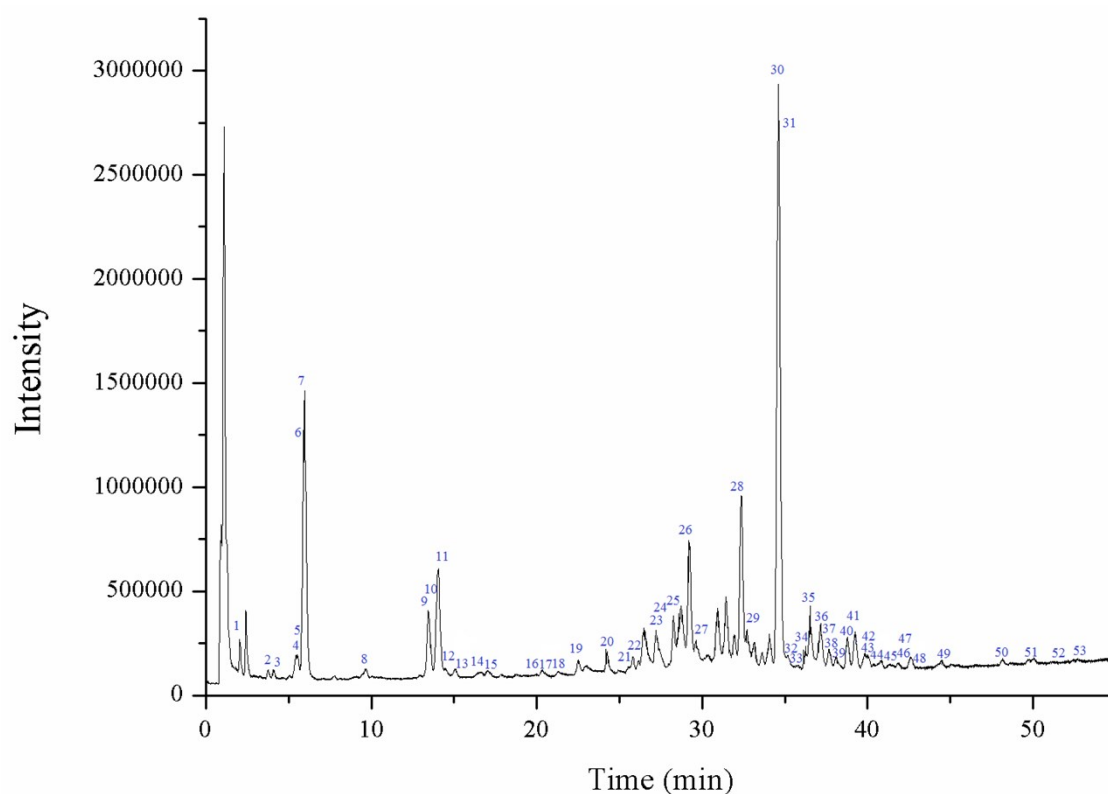

**Fig. S2.** Total ion chromatogram of *Glycyrrhizae Inflatae* granule in negative ion mode.

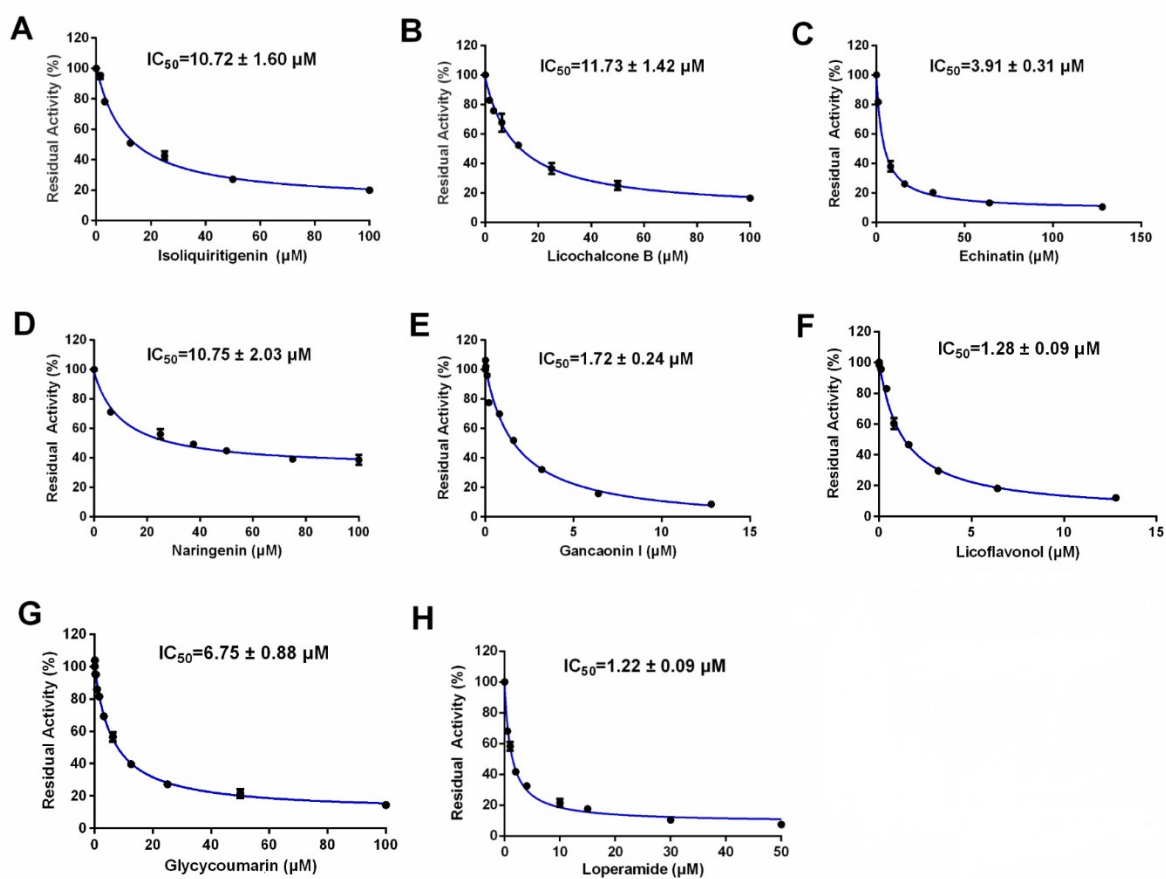

**Fig. S3** The dose-inhibition curves of Isoliquiritigenin (A), Licochalcone B (B), Echinatin (C), Naringenin (D), Gancaonin I (E), Licoflavonol (F), Glycycoumarin (G) and Loperamide (H) against hCES2A-mediated FD hydrolysis. All data were shown as mean  $\pm$  SD of triplicate assays.

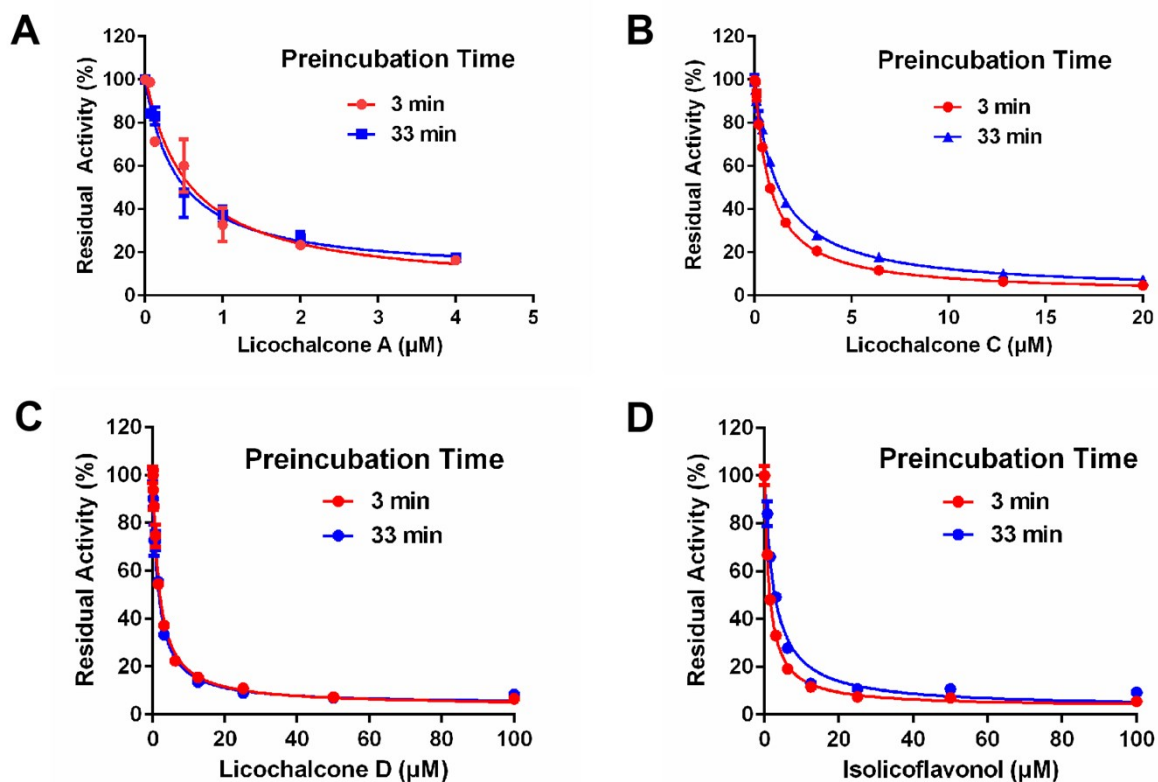

**Fig. S4** Time-dependent inhibition assays of Licochalcone A (A), Licochalcone C (B), Licochalcone D (C) and Isolicoflavonol (D) on hCES2A using FD as the substrate. All data were shown as mean  $\pm$  SD of triplicate determinations.

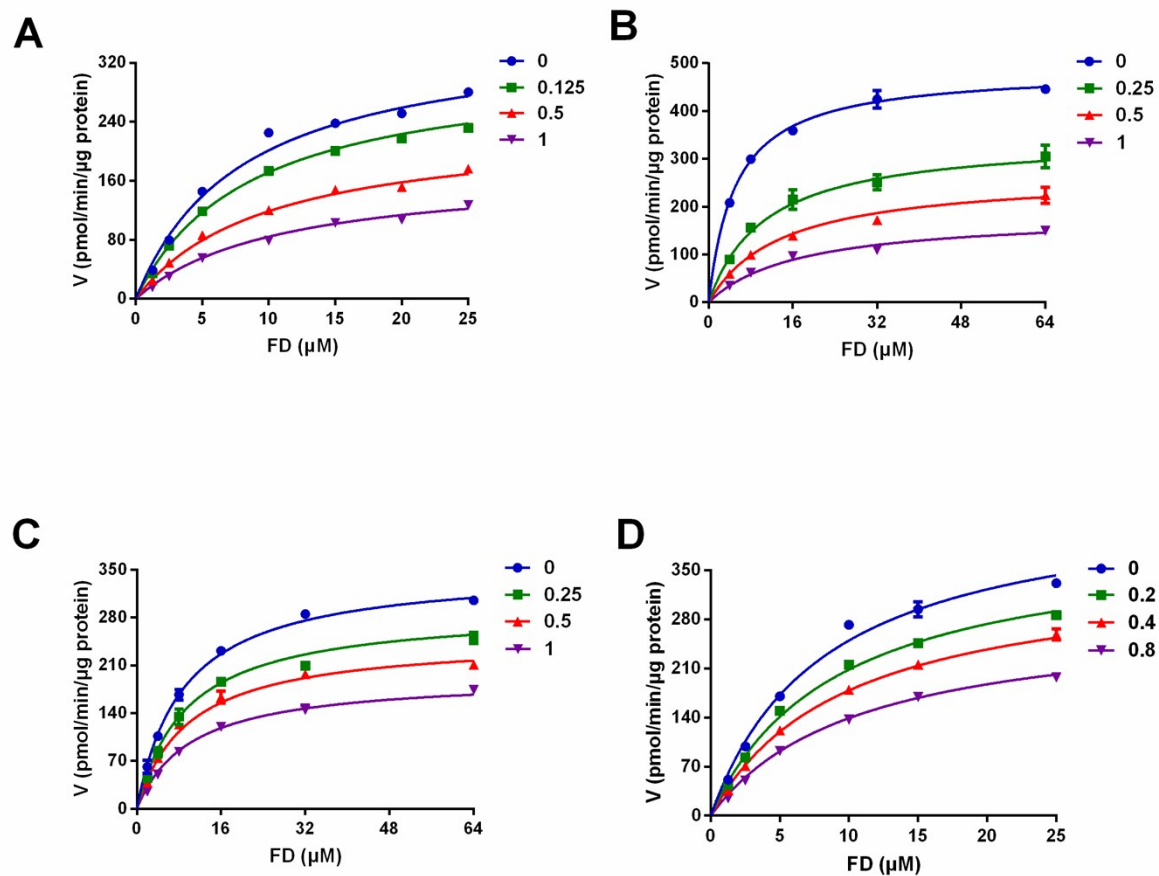

**Fig. S5** The inhibition kinetic plots of Licochalcone A (A), Licochalcone C (B), Licochalcone D (C) and Isolicoflavonol (D) on hCES2A using FD as the substrate. All data were shown as mean  $\pm$  SD of triplicate determinations.

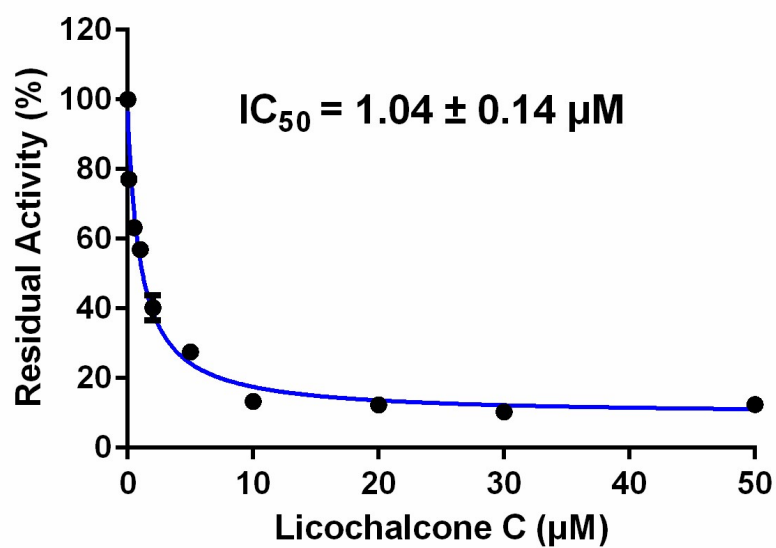

**Fig. S6** Dose-inhibition curve of Licochalcone C against intracellular hCES2A in living HepG2 cells. All data were shown as mean  $\pm$  SD of triplicate determinations.

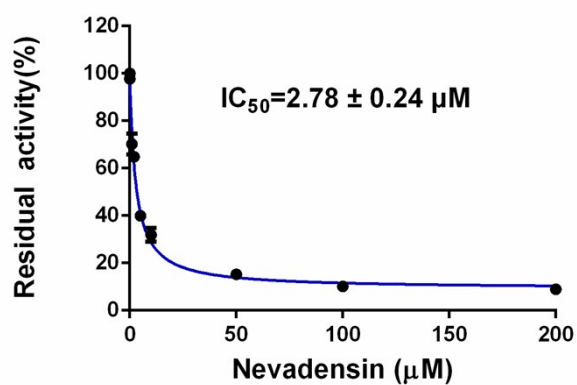

**Fig. S7** Dose-inhibition curves of nevadensin against hCES1A-mediated DME hydrolysis in HLM. All data were shown as mean  $\pm$  SD of triplicate assays.

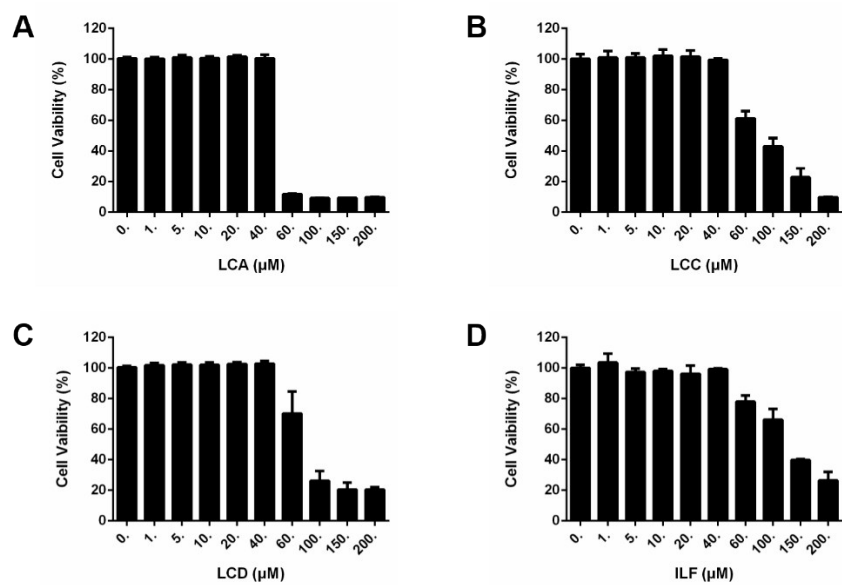

**Fig. S8** Cytotoxicity assay of Licochalcone A (A), Licochalcone C (B), Licochalcone D (C) and Isolicoflavonol (D) in HepG2 cells. All data were shown as mean  $\pm$  SD of triplicate determinations.

**Table S1.** The predicted binding energy and CDOCKER interaction energy values of 53 constituents from licorice and Loperamide.

| No. | Compound                         | Binding Energy (kcal/mol) | CDOCKER Interaction Energy (kcal/mol) | IC <sub>50</sub> (μM) |
|-----|----------------------------------|---------------------------|---------------------------------------|-----------------------|
| 1   | Glucoliquiritin apioside         | > 0                       | --                                    | --                    |
| 2   | Schaftoside                      | > 0                       | --                                    | --                    |
| 3   | Glucoliquiritin                  | > 0                       | --                                    | --                    |
| 4   | Neoliquiritin*                   | > 0                       | --                                    | >100                  |
| 5   | Glucosiliquiritin                | > 0                       | --                                    | --                    |
| 6   | Liquiritin apioside*             | > 0                       | --                                    | >100                  |
| 7   | Liquiritin*                      | -23.4146                  | -40.7349                              | >100                  |
| 8   | 5-hydroxyliquiritin              | -40.0189                  | -47.0485                              | --                    |
| 9   | Isoliquiritin apioside           | -43.3705                  | -50.8770                              | --                    |
| 10  | Isoliquiritin                    | -173.228                  | -55.6469                              | --                    |
| 11  | Liquiritigenin*                  | > 0                       | --                                    | >100                  |
| 12  | Licochalcone B*                  | -166.808                  | -56.216                               | 11.73 ± 1.42          |
| 13  | Neoisoliquiritin                 | -72.1795                  | -38.319                               | --                    |
| 14  | Licorice glycoside B             | -88.6195                  | -24.1624                              | --                    |
| 15  | Licorice glycoside A             | > 0                       | --                                    | --                    |
| 16  | LicoricesaponinO4                | ND                        | --                                    | --                    |
| 17  | naringenin*                      | -229.693                  | -49.5519                              | 10.75 ± 2.03          |
| 18  | Genistein                        | > 0                       | --                                    | --                    |
| 19  | Echinatin*                       | -265.935                  | -49.8474                              | 3.91 ± 0.31           |
| 20  | Licorice saponin J2              | > 0                       | --                                    | --                    |
| 21  | 24-Hydroxy-licorice-saponin A3   | ND                        | --                                    | --                    |
| 22  | 22-Hydroxy-licorice-saponin G2   | > 0                       | --                                    | --                    |
| 23  | Isoliquiritigenin*               | -201.558                  | -49.9137                              | 10.72 ± 1.60          |
| 24  | Licoricesaponin M3               | ND                        | --                                    | --                    |
| 25  | Formononetin*                    | -65.4651                  | -27.327                               | >100                  |
| 26  | 22β-Acetoxyglycyrrhizic acid     | ND                        | --                                    | --                    |
| 27  | 23-Hydroxyl licorice saponin E 2 | ND                        | --                                    | --                    |
| 28  | licoricesaponin G 2              | ND                        | --                                    | --                    |
| 29  | 22β-Acetoxy licorice saponin J 2 | ND                        | --                                    | --                    |
| 30  | Glycyrrhizic Acid*               | ND                        | --                                    | >100                  |
| 31  | licoricesaponin A3               | ND                        | --                                    | --                    |
| 32  | Licochalcone D*                  | -98.7995                  | -45.2915                              | 0.94 ± 0.11           |
| 33  | Gancaonin L                      | -78.5992                  | -36.9273                              | --                    |

|    |                                   |          |          |             |
|----|-----------------------------------|----------|----------|-------------|
| 34 | Licoricesaponin b2                | ND       | --       | --          |
| 35 | LicoricesaponinH2                 | ND       | --       | --          |
| 36 | Gancaonin M                       | -74.1977 | -34.1285 | --          |
| 37 | Glycycoumarin*                    | -174.782 | -55.4037 | 6.75 ± 0.88 |
| 38 | Licoagrodione                     | -137.442 | -36.0848 | --          |
| 39 | Licoricesaponin K2                | ND       | --       | --          |
| 40 | Apioglycyrrhizin                  | ND       | --       | --          |
| 41 | Gancaonin C                       | -188.469 | -46.637  | --          |
| 42 | Licochalcone C*                   | -257.661 | -55.0714 | 0.39 ± 0.04 |
| 43 | Licoricesaponin C2                | ND       | --       | --          |
| 44 | Licochalcone A*                   | -281.533 | -55.1037 | 0.54 ± 0.06 |
| 45 | Isolicoflavonol*                  | -294.014 | -58.7403 | 0.60 ± 0.08 |
| 46 | Licoflavonol*                     | -292.033 | -53.3065 | 1.28 ± 0.09 |
| 47 | Isoglycyrol                       | > 0      | --       | --          |
| 48 | Glycyrrhetic acid 3-O-glucuronide | ND       | --       | --          |
| 49 | Gancaonin G                       | -172.989 | -34.4663 | --          |
| 50 | kanzonol R                        | > 0      | --       | --          |
| 51 | Licofuranone                      | -35.9798 | -34.3298 | --          |
| 52 | Gancaonin I*                      | -215.515 | -54.1744 | 1.72 ± 0.24 |
| 53 | Glycyrrhetic acid                 | > 0      | --       | --          |
| -- | Loperamide                        | -69.9112 | -34.2231 | 1.22 ± 0.09 |

Note: ND represented that the small molecule could not been docked into the active cavity of hCES2A. Twenty-four ligands with binding energy less than 0 were further screened by CDOCKER analyses. Seventeen compounds with lower binding energy values and CDOCKER interaction energy values than LPA were shown in blue.

**Table S2.** AutoDock vina results of Licochalcone C docked with hCES2A

| Binding Site | Binding affinity<br>(kcal/mol) |
|--------------|--------------------------------|
| site I       | -8.2                           |
| site II      | -8.0                           |

**S1. The ethics policy statement and product report provided by BioreclamationIVT.**

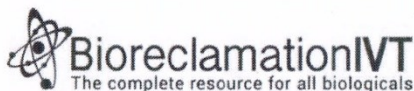

BioreclamationIVT, LLC  
1450 S. Rolling Road  
Baltimore, MD 21227  
USA

T +1 410 455 1242  
F +1 410 455 1245

**BioreclamationIVT Ethics Policy Statement**

BioreclamationIVT has established itself as the leading industry supplier of quality ADME-Tox products to pharmaceutical, government, and academic institutions. BioreclamationIVT maintains strict adherence to all applicable ethical guidelines and regulations, as well as an inherent respect for the origin and dispositions for the materials we possess. BioreclamationIVT does not traffic in human tissue, and as such will only reimburse verified non-profit providers of research tissue for appropriate costs of tissue procurement, preparation, and transportation. BioreclamationIVT has the utmost respect and appreciation for all donated tissues and thus strives to apply the best available technologies, quality control, and business practices to ensure the best and most efficient use of the tissues received from all sources. Unprocessed tissue is never offered for resale. BioreclamationIVT will only market tissue derivatives such as cells and sub-cellular fractions. BioreclamationIVT does not accept any tissues or organs for cell processing that are qualified for transplant. BioreclamationIVT only procures tissue from within the United States, and categorically refuses offers of tissue/organs from any country other than the United States, since effective procurement and informed consent procedures are often lacking or not consistent with the practices and standards of our company. In keeping with this practice, BioreclamationIVT has appropriate procedures in place not only to safeguard the confidentiality of tissue sources, but to ensure the anonymity of any information shared with researchers related to such tissues. BioreclamationIVT educates all company personnel to treat the tissue and organs that we receive with the respect and dignity accorded to its' human origin.

Dan Dryden  
Director, Product Operations  
BioreclamationIVT

**InVitroCYP™ M-class 50-donor Mixed Gender Pooled  
Human Liver Microsomes, 10 mg**

**Product Number: X008067**

**Lot Number** IHG

**Storage Conditions** -70°C

**Test Results**

**Specification**

20-26 mg/mL protein concentration  
≥0.220 nmol/mg total P450 concentration

**Result**

20.9 mg/mL  
0.347 nmol/mg

**Lot Characterization Results**

**Assay**

ECOD: total rate of formation of 7-HC and metabolites  
UGT: rate of formation of 7-hydroxycoumarin glucuronide  
CYP1A2: rate of formation of acetaminophen  
CYP2A6: total rate of formation of 7-HC and metabolites  
CYP2B6: rate of formation of hydroxybupropion  
CYP2C8: rate of formation of desethylamodiaquine  
CYP2C9: rate of formation of 4'-methylhydroxytolbutamide  
CYP2C19: rate of formation of 4'-hydroxymephenytoin  
CYP2D6: rate of formation of dextrophan  
CYP2E1: rate of formation of 6-hydroxychlorzoxazone  
CYP3A4:  
rate of formation of 6β-hydroxytestosterone  
rate of formation of 1-hydroxymidazolam

**Enzyme  
activity**

292 pmol/min/mg  
1758 pmol/min/mg  
292 pmol/min/mg  
191 pmol/min/mg  
105 pmol/min/mg  
950 pmol/min/mg  
111 pmol/min/mg  
37.9 pmol/min/mg  
55.3 pmol/min/mg  
474 pmol/min/mg  
899 pmol/min/mg  
335 pmol/min/mg

**Kinetic Parameters:**

| CYP               | 1A2  | 2A6   | 2B6  | 2C8  | 2C9   | 2C19  | 2D6  | 2E1  | 3A4<br>Tes* | 3A4<br>Mid | UGT<br>1A1 | UGT<br>1A4 | UGT<br>1A6 | UGT<br>1A9 | UGT<br>2B7 |
|-------------------|------|-------|------|------|-------|-------|------|------|-------------|------------|------------|------------|------------|------------|------------|
| $K_m$             | 117  | 1.65  | 89.6 | 1.14 | 208   | 39.2  | 12.0 | 188  | 105         | 8.35       | 14.8       | 31.7       | 1870       | 53.3       | 2749       |
| $V_{max}$         | 0.9  | 0.954 | 0.56 | 1.53 | 0.043 | 0.025 | 0.24 | 1.01 | 5.10        | 2.28       | 3.64       | 4.01       | 44         | 8.59       | 9.06       |
| Cl <sub>int</sub> | 7.72 | 578   | 6.3  | 1349 | 0.2   | 0.6   | 19.8 | 5.39 | 48.7        | 274        | 246        | 126        | 23.5       | 161        | 3.29       |

$K_m$  is recorded as  $\mu M$ .  $V_{max}$  is recorded as nmol/min/mg protein. Cl<sub>int</sub> is recorded as  $\mu L/mg/min$ .

\* Testosterone at 0.1 mg/mL

Updated to include  $K_m$ ,  $V_{max}$  and Cl<sub>int</sub> results

**Caution:** This product was prepared from fresh human tissue. Treat all products containing human-derived materials as potentially infectious, as no known test methods can offer assurance that products derived from human tissues will not transmit infectious agents.

These products are for research use only. Do not use in animals or humans. These products have not been approved for any diagnostic or clinical procedures.

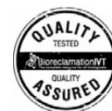

**Donor Demographics, as reported to BioreclamationIVT**

| Gender | Age | Race | Cause of death                   | Height | Weight | Social history                                                              | Medical history                                                                                                                                                                                                                                                                                                                                                                                  | Serology testing |     |     |             |             |     |
|--------|-----|------|----------------------------------|--------|--------|-----------------------------------------------------------------------------|--------------------------------------------------------------------------------------------------------------------------------------------------------------------------------------------------------------------------------------------------------------------------------------------------------------------------------------------------------------------------------------------------|------------------|-----|-----|-------------|-------------|-----|
|        |     |      |                                  |        |        |                                                                             |                                                                                                                                                                                                                                                                                                                                                                                                  | EBV              | RPR | CMV | Hepatitis B | Hepatitis C | HIV |
| F      | 41  | H    | Stroke                           | 66"    | 79 Kg  | No ETOH, Tobacco or drug use                                                | Appendectomy 16 yrs ago.<br><br>HIE at birth, 2nd to placental abruption, w/ IDCP, Trach for bronchomalacia at 5 mos; Nissan/g-tube at 2 mos, T&A, PE tubes, seizure disorder, last seizure 2 wks ago, allergy to propofol w/resp distress, Meds: coenzyme Q10, Keppra                                                                                                                           | Not reported     | Neg | Pos | Neg         | Neg         | Neg |
| F      | 5   | C    | Anoxia                           | 3'8"   | 40 lb  | No ETOH, Tobacco or drug use                                                |                                                                                                                                                                                                                                                                                                                                                                                                  | IgG +            | Neg | Pos | Neg         | Neg         | Neg |
| F      | 38  | C    | Head Trauma; 2nd to Blunt Injury | 5'4"   | 164lb  | ETOH: 4-5 drinks/day x 23yrs; Tobacco: 1 ppd since teen; no drug use.       | Circulation problems suggesting signs of MS<br><br>Rib fractures, contusions, pneumothorax, chest tube, occipital dislocation, quadriparesis, positive sputum culture for strep pneumo.                                                                                                                                                                                                          | Not reported     | Neg | Pos | Neg         | Neg         | Neg |
| F      | 35  | C    | Blunt Injury; 2nd to MVA         | 68"    | 196 lb | No ETOH; Tobacco: 3-4 cig/day; Marijuana daily                              | Appendectomy, hysterectomy, partial gastrectomy, bleeding ulcers, HTN, renal insuff - no meds; Med: Lasix                                                                                                                                                                                                                                                                                        | Not reported     | Neg | Neg | Neg         | Neg         | Neg |
| F      | 77  | C    | CVA                              | 63"    | 58 Kg  | No ETOH, Tobacco or drug use                                                | Heterozygous leiden factor 5 deficiency, HTN x 5yrs, multiple fractures and sxs - cervical, clipped nerve, shoulder, thumb, lumbar infusion, knee replacement, pituitary adenoma 1 yr ago, Pos TB skin test - not sure when cleared. Some type of hepatitis after meno., cellulitis. Meds: vitamins, neurontin, lynca, vicodin, docazosin, deflucan, coumadin, DVT's, fluoxetine, zocov, zeltia. | Not reported     | Neg | Pos | Neg         | Neg         | Neg |
| F      | 58  | C    | CVA                              | 65"    | 88 Kg  | ETOH: 1-2 drinks/yr; tobacco: 1-2ppd x 30yrs - quit 10 yrs ago; no drug use |                                                                                                                                                                                                                                                                                                                                                                                                  | Not reported     | Neg | Pos | Neg         | Neg         | Neg |

**Caution:** This product was prepared from fresh human tissue. Treat all products containing human-derived materials as potentially infectious, as no known test methods can offer assurance that products derived from human tissues will not transmit infectious agents.

These products are for research use only. Do not use in animals or humans. These products have not been approved for any diagnostic or clinical procedures.

| Gender | Age | Race | Cause of death                          | Height | Weight | Social history                                                                                                                                | Medical history                                                                                                                                                                                                                | EBV          | RPR | CMV          | Hepatitis B | Hepatitis C | HIV |
|--------|-----|------|-----------------------------------------|--------|--------|-----------------------------------------------------------------------------------------------------------------------------------------------|--------------------------------------------------------------------------------------------------------------------------------------------------------------------------------------------------------------------------------|--------------|-----|--------------|-------------|-------------|-----|
| F      | 52  | C    | Cardiac Arrest; 2nd to Head trauma/Fall | 64"    | 79 Kg  | No ETOH, Tobacco or drug use                                                                                                                  | High cholesterol, diabetes NIDDM x 10yrs - oral meds                                                                                                                                                                           | Not reported | Neg | Pos          | Neg         | Neg         | Neg |
| F      | 58  | C    | Anoxia; 2nd to pulm embolism            | 64"    | 78 Kg  | ETOH: 6yrs extensively - 1 gallon of vodka QD, quit 1-1/2 yrs ago; Tobacco: 40 pack yrs; Drugs: Marijuana 1 x 1 month                         | Positive Tox screen (ETOH/ anti-depressants), bipolar. Meds: antidepressant                                                                                                                                                    | Not reported | Neg | Not reported | Neg         | Neg         | Neg |
| F      | 40  | B    | ICH; 2nd to SAH & cerebral edema        | 70"    | 115Kg  | ETOH: social, Tobacco: 1ppd x 20yrs, Drugs: possible marijuana                                                                                | Diabetes - inconsistent w/meds, HTN x 10yrs - non-compliant, bipolar, pituitary tumor 8 yrs ago, renal cell carcinoma - kidney; Meds: Coreg, effexor, ferous sulfate, novolog-insulin, lipitor, lisinopril, norvasc, clonidine | Not reported | Neg | Pos          | Neg         | Neg         | Neg |
| F      | 73  | C    | Stroke                                  | 66"    | 74 Kg  | No ETOH or drug use; Tobacco - quit 37 yrs ago                                                                                                | HTN, GERD                                                                                                                                                                                                                      | Not reported | Neg | Pos          | Neg         | Neg         | Neg |
| F      | 65  | C    | CVA/Stroke; 2nd to ICH/Stroke           | 63"    | 87 Kg  | No ETOH, Tobacco or drug use                                                                                                                  | HTN-med compliant, knee replacement 1 yrs ago, back sx for ruptured disk 8 - 10 yrs ago                                                                                                                                        | Not reported | Neg | Pos          | Neg         | Neg         | Neg |
| F      | 35  | C    | SIGSWH                                  | 64"    | 142lb  | ETOH: Binge drinker - quit 1 yr ago; Tobacco: 2 cigs/day; Drugs: IV drug abuse 1 yr ago, snorted cocaine 9yrs ago, marijuana 3x/wk for years. | No other medical history                                                                                                                                                                                                       | Not reported | Neg | Pos          | Neg         | Neg         | Neg |
| F      | 78  | C    | CVA                                     | 58"    | 57 Kg  | Tobacco: 1ppd x 40 yrs - quit; No ETOH or drug use                                                                                            | HTN x 1 yr, high cholesterol, bursitis L hip                                                                                                                                                                                   | Not reported | Neg | Pos          | Neg         | Neg         | Neg |
| F      | 56  | C    | ICH-Stroke                              | 5'5"   | 152lb  | ETOH: Couple glasses wine a day x 3yrs; tobacco: 1ppd x 40 yrs, no drug use                                                                   | Cardiac disease, Rheumatoid fever 47 yrs ago (treated w/rest)                                                                                                                                                                  | IgG+         | Neg | Pos          | HbsAb+      | Neg         | Neg |
| F      | 56  | C    | ICH                                     | 69"    | 245lb  | No ETOH, Tobacco or drug use                                                                                                                  | Diabetes and HTN >10yrs - compliant, mild stroke 3 mos ago. Meds: Insulin, HTN                                                                                                                                                 | Not reported | Neg | Pos          | Neg         | Neg         | Neg |

**Caution:** This product was prepared from fresh human tissue. Treat all products containing human-derived materials as potentially infectious, as no known test methods can offer assurance that products derived from human tissues will not transmit infectious agents.

These products are for research use only. Do not use in animals or humans. These products have not been approved for any diagnostic or clinical procedures.

| Gender | Age | Race | Cause of death                | Height | Weight | Social history                                                                                                                                | Medical history                                                                                                                                                                                                                                                   | EBV          | RPR | CMV          | Hepatitis B | Hepatitis C | HIV |
|--------|-----|------|-------------------------------|--------|--------|-----------------------------------------------------------------------------------------------------------------------------------------------|-------------------------------------------------------------------------------------------------------------------------------------------------------------------------------------------------------------------------------------------------------------------|--------------|-----|--------------|-------------|-------------|-----|
| F      | 48  | C    | CVA                           | 66"    | 87 Kg  | No ETOH, Tobacco or drug use                                                                                                                  | Peripheral artery disease, ESRD, HTN, hyperlipidemia, DM, CAD, AV fistula occlusion, hemodialysis. Meds: Amoxicillin, clopidogrel, carvedilol, folic acid, glimepiride, sertraline, zolpidem, clonidine, amlodipine                                               | Pos          | Neg | Pos          | Neg         | Neg         | Neg |
| F      | 39  | C    | Anoxia; 2nd to Cardiac arrest | 63"    | 90 Kg  | ETOH: occasionally; Tobacco: 1/2 ppd x 10yrs; Drugs: abused prescription narcotics, smoked marijuana                                          | HTN x 3yrs: non-compliant                                                                                                                                                                                                                                         | Pos          | Neg | Pos          | Neg         | Neg         | Neg |
| F      | 49  | A    | CVA/Stroke                    | 55"    | 99 lb  | No ETOH, Tobacco or drug use                                                                                                                  | HTN, DM (6-10 yrs), c-section 8 yrs ago; Meds - possible Anti-HTN.                                                                                                                                                                                                | Not reported | Neg | Not reported | Neg         | Neg         | Neg |
| F      | 62  | C    | CVA                           | 64"    | 179lb  | No ETOH or drug use; Tobacco: >20 pack yrs - quit 6 months ago.                                                                               | T2D (NIDDM) x15yrs - unknown if compliant, HTN 0-5yrs - compliant, CHF, thyroid disease, ESRD with dialysis, COPD, emphysema, colonoscopy with cauterization (no cancer), Steven Johnson syndrome - 3.5yrs ago, dialysis 3x/wk x 4yrs, born w/1 kidney - atrophic | IgG+         | Neg | Pos          | Neg         | Neg         | Neg |
| F      | 43  | C    | Anoxia                        | 61"    | 80 Kg  | No ETOH; Tobacco: 1/2 ppd x 25 yrs; Drugs: Prescription pill abuse, tox screen ps for benzo & opiate, bruised track marks noted, denied IVDA. | HTN, chronic back pain, rectal ulcer, IBS, ovarian cancer 16 yrs ago - treated w/ chemo and radiation, UTI, MI x2, seizure secondary to detox, tonsillectomy, hysterectomy, oophorectomy, cardiac cath 1 yr ago; Meds: methadone, clonidine, neurontin.           | Not reported | Neg | Not reported | Neg         | Neg         | Neg |
| F      | 74  | C    | Head Trauma                   | 65"    | 53 Kg  | ETOH: 3-4 glasses of wine/day x 30yrs; No tobacco or drug use                                                                                 | No history provided.                                                                                                                                                                                                                                              | Pos          | Neg | Pos          | Neg         | Neg         | Neg |

**Caution:** This product was prepared from fresh human tissue. Treat all products containing human-derived materials as potentially infectious, as no known test methods can offer assurance that products derived from human tissues will not transmit infectious agents.

These products are for research use only. Do not use in animals or humans. These products have not been approved for any diagnostic or clinical procedures.

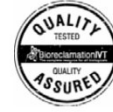

| Gender | Age | Race | Cause of death                     | Height | Weight | Social history                                                                               | Medical history                                                                                                                                                                                                   | EBV          | RPR | CMV | Hepatitis B | Hepatitis C | HIV |
|--------|-----|------|------------------------------------|--------|--------|----------------------------------------------------------------------------------------------|-------------------------------------------------------------------------------------------------------------------------------------------------------------------------------------------------------------------|--------------|-----|-----|-------------|-------------|-----|
| F      | 71  | C    | ICH                                | 67"    | 132Kg  | ETOH: 3 glasses wine QDx50 yrs; Tobacco - quit 25 yrs ago; no drug use                       | Knee replacement, hysterectomy, 5 yrs ago-long plane fit-DVT in leg - progressed to PE. Meds: Coumadin, Paxil                                                                                                     | Not reported | Neg | Pos | Neg         | Neg         | Neg |
| F      | 63  | C    | Anoxia; 2nd to Cardio-vascular     | 69"    | 100 Kg | No ETOH, Tobacco or drug use                                                                 | HTN - med compliant, unknown med names                                                                                                                                                                            | Not reported | Neg | Pos | Neg         | Neg         | Neg |
| F      | 73  | C    | CVA                                | 59"    | 60 Kg  | ETOH- Occasional; Tobacco: 1ppd x 20-30 yrs; no drug use                                     | High Cholesterol, hysterectomy 45 yrs ago, benign cyst in breast. Meds: Lipitor.                                                                                                                                  | Not reported | Neg | Neg | Neg         | Neg         | Neg |
| F      | 70  | C    | ICH/Stroke                         | 66"    | 89 Kg  | No ETOH; Tobacco: 1 ppd x 25-30yrs - quit 3 months ago; no drug use                          | Hypothyroidism, HTN, Hyperlipidemia, knee surgery 8 mos. ago, extremely dry skin. Meds: cortisone, synthroid, aspirin, lipitor                                                                                    | Not reported | Neg | Pos | Neg         | Neg         | Neg |
| M      | 49  | C    | CVA                                | 75"    | 110Kg  | Tobacco: 2ppd x 30 yrs; No ETOH; smoked marijuana and cocaine abuse                          | Untreated HTN, chronic back pain, appendectomy; Meds: Ambien                                                                                                                                                      | Not reported | Neg | Pos | Neg         | Neg         | Neg |
| M      | 49  | C    | CVA                                | 70"    | 256lb  | No ETOH, Tobacco or drug use                                                                 | HTN x 10yrs, Diabetes 6-10yrs, CAD. Meds: anti-HTN, diabetes                                                                                                                                                      | Not reported | Neg | Neg | Neg         | Neg         | Neg |
| M      | 54  | C    | ICH                                | 73"    | 125Kg  | ETOH: quit 3 yrs ago; Tobacco: 1 -2 ppd x 35 yrs; No drug use.                               | 2x GSW injuries, gall bladder & appendix removed                                                                                                                                                                  | Not reported | Neg | Neg | Neg         | Neg         | Neg |
| M      | 29  | C    | GSW                                | 69"    | 94 Kg  | ETOH: Alcoholic; Tobacco: 1 ppd x 8 yrs; no drug use                                         | Depression                                                                                                                                                                                                        | Not reported | Neg | Neg | Neg         | Neg         | Neg |
| M      | 85  | C    | Head Trauma; 2nd to Fall from roof | 68"    | 251lb  | No ETOH or Tobacco use. No drug use reported, but tox screen positive for benzos and opiates | NIDDM >10yrs, HTN >10yrs - compliant, ruptured bladder - 35 yrs ago, ruptured gallbladder 3 yrs ago, Cataracts-bilat. Meds: Oral meds for diabetes, HTN                                                           | IgG+         | Neg | Pos | Neg         | Neg         | Neg |
| M      | 56  | B    | CVA                                | 71"    | 103Kg  | No ETOH, Tobacco or drug use                                                                 | Tooth extraction, CABG, end stage renal disease x 7 yrs, CAD, pneumonia 1 yr ago, HTN x 25 yrs, enlarged heart >15 yrs, IDDM, heart bypass 2 yrs ago, high blood pressure > 25 yrs, previous pos skin test for TB | Not reported | Neg | Pos | Neg         | Neg         | Neg |

**Caution:** This product was prepared from fresh human tissue. Treat all products containing human-derived materials as potentially infectious, as no known test methods can offer assurance that products derived from human tissues will not transmit infectious agents.

These products are for research use only. Do not use in animals or humans. These products have not been approved for any diagnostic or clinical procedures.



| Gender | Age | Race | Cause of death                | Height | Weight | Social history                                                                                                                            | Medical history                                                                                                                                                                                                                                                                                                                                                                                                                 | EBV          | RPR | CMV | Hepatitis B | Hepatitis C | HIV |
|--------|-----|------|-------------------------------|--------|--------|-------------------------------------------------------------------------------------------------------------------------------------------|---------------------------------------------------------------------------------------------------------------------------------------------------------------------------------------------------------------------------------------------------------------------------------------------------------------------------------------------------------------------------------------------------------------------------------|--------------|-----|-----|-------------|-------------|-----|
| M      | 64  | C    | CVA                           | 74"    | 150 Kg | ETOH: 2 beer/year;<br>Tobacco: 4ppd x 15 yrs previously - quit 20 yrs ago; no drug use                                                    | Sq cell CA removed on hands 6 mos. ago, NIDDM x 10 yrs, HTN 15-20 yrs, PVD, Osteoarthritis, Bilat knee repl., kidney stones removed 33 yrs ago; Meds: Glucoside, quinine, isosorbide, metoprolol, aspirin                                                                                                                                                                                                                       | Not reported | Neg | Neg | Neg         | Neg         | Neg |
| M      | 56  | C    | Anoxia 2nd to Cardio-vascular | 5'1"   | 86 Kg  | Tobacco: cigarettes 2 PPD x 40 yrs, quit 1.5 yrs ago; No alcohol and drug use                                                             | Asthma, diagnosed 2 yrs ago, unk if compliant w/ treatment; COPD; Meds: Vit B & C, Albuterol inhaler, SMZ with Phenazopyridine.                                                                                                                                                                                                                                                                                                 | Not reported | Neg | Pos | Neg         | Neg         | Neg |
| M      | 45  | C    | Anoxia; 2nd to Asphyxiation   | 6'2"   | 152lb  | ETOH: (Beer, Vodka) 6-12 pack beer/day; unknown duration; occasionally drank vodka; Tobacco: 2-3 PPD, unk duration; no drug use reported. | Stomach ulcers - unknown duration or compliance. Meds: Promethazine                                                                                                                                                                                                                                                                                                                                                             | IgG +        | Neg | Pos | Neg         | Neg         | Neg |
| M      | 77  | C    | CVA                           | 71"    | 118Kg  | ETOH: beer 2-3/night x 40yrs - quit 10yrs ago; Tobacco: 3ppd x 10yrs - quit 50yrs ago; no drug use                                        | HTN x 15yrs, high cholesterol, past heart attack, diabetes 10-15 yrs, CABG 15 yrs ago, cataracts 1 - 2 yrs ago, toe surgery, renal insufficiency, CVA, TIA 10 yrs ago, allergic to penicillin, blood transfusion during CABG, arthritis in hips, fingers, spine; exposed to asbestos in past. Meds: HTN meds, Humalog, Lantus, Aranesp, ASA, Calcitrol, Lasix, Hytrin, Lipitor, Diovan, Niaspan ER, Tencimin, Coumadin, Vit. B. | Not reported | Neg | Pos | Neg         | Neg         | Neg |
| M      | 51  | C    | CVA                           | 70"    | 161lb  | ETOH: daily to weekly, beer moderately; Tobacco: smoker x 30 yrs; Drugs: marijuana in 80's                                                | T2D x 1 -2 yrs-compliant, kidney stones, HTN x 10 yrs - compliant                                                                                                                                                                                                                                                                                                                                                               | Not reported | Neg | Neg | Neg         | Neg         | Neg |

**Caution:** This product was prepared from fresh human tissue. Treat all products containing human-derived materials as potentially infectious, as no known test methods can offer assurance that products derived from human tissues will not transmit infectious agents.

These products are for research use only. Do not use in animals or humans. These products have not been approved for any diagnostic or clinical procedures.



| Gender | Age | Race | Cause of death                        | Height | Weight | Social history                                                                                                                                            | Medical history                                                                                                                                                                                                                  | EBV          | RPR          | CMV | Hepatitis B | Hepatitis C | HIV |
|--------|-----|------|---------------------------------------|--------|--------|-----------------------------------------------------------------------------------------------------------------------------------------------------------|----------------------------------------------------------------------------------------------------------------------------------------------------------------------------------------------------------------------------------|--------------|--------------|-----|-------------|-------------|-----|
| M      | 59  | AA   | ICH; 2nd to CVA                       | 6'     | 89 Kg  | ETOH: Beer/Wine, quit > 25 years ago; Tobacco: quit > 25 years ago; Drugs: quit > 25yrs ago                                                               | HTN - unknown duration                                                                                                                                                                                                           | Not reported | Not reported | Pos | Neg         | Neg         | Neg |
| M      | 44  | C    | Head Trauma/ GSW                      | 70"    | 71.4Kg | ETOH: Vodka 1-2 liters, beer 12-18 (per day?) cans since young age. Heavy drinking began 12 yrs ago. Tobacco: Chew 2-3 cans per day x 31yrs; no drug use. | HTN x5yrs - non-compliant. Meds: HBP, possible pain meds                                                                                                                                                                         | IgG+         | Neg          | Neg | Neg         | Neg         | Neg |
| M      | 38  | C    | Blunt Head Trauma: 2nd to MVA         | 74"    | 124Kg  | ETOH: 3-5 beers socially on weekends; Tobacco: 1-2 ppw x 15 yrs; Drugs: none reported but positive for THC on Admit and benzos (after ACLS meds)          | Hernia repair - 1 yr ago, eyelid laceration - 16 yrs ago, c/o stiff knees                                                                                                                                                        | Not reported | Neg          | Neg | Neg         | Neg         | Neg |
| M      | 51  | C    | IC Bleed                              | 70"    | 298lb  | ETOH: as a teen; no tobacco use; Drugs: Marijuana as a teen                                                                                               | Diabetes Type II, HTN x 6yrs, noncaseating granuloma                                                                                                                                                                             | Not reported | Neg          | Pos | Neg         | Neg         | Neg |
| M      | 41  | C    | Head trauma; 2nd to SIGSW to the head | 74"    | 90 Kg  | ETOH: 1-2 per month; Tobacco: 2ppd x 25yrs; Drugs: Marijuana once per week.                                                                               | Pero-anal abscess 1 week ago, felicitulitis, bronchitis 1 month ago, chronic back pain, non-cancerous lipoma.                                                                                                                    | Not reported | Neg          | Pos | Neg         | Neg         | Neg |
| M      | 59  | C    | CVA                                   | 68"    | 218lb  | No ETOH or drug use; Tobacco: 3ppd                                                                                                                        | Prostatectomy, coronary artery disease, HTN-compliant, cardiac stents, COPD & emphysema. Meds: Inhalers                                                                                                                          | Not reported | Neg          | Pos | Neg         | Neg         | Neg |
| M      | 53  | C    | CVA 2nd to ICH                        | 72 "   | 100Kg  | ETOH: few beer/month x 4 years; no Tobacco or drug use                                                                                                    | HTN-inconsistent compliance w/ meds (4 yrs), Type 1 IDDM - inconst. compliance w/ meds (4 yrs), Carpal Tunnel Sx 2 yrs ago, Heart Attack 4 yrs ago; Meds: HTN meds, Insulin, coumadin, over the counter prostate/urination meds. | Not reported | Neg          | Neg | Neg         | Neg         | Neg |

**Caution:** This product was prepared from fresh human tissue. Treat all products containing human-derived materials as potentially infectious, as no known test methods can offer assurance that products derived from human tissues will not transmit infectious agents.

These products are for research use only. Do not use in animals or humans. These products have not been approved for any diagnostic or clinical procedures.

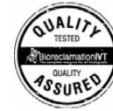

| Gender | Age | Race | Cause of death                       | Height | Weight | Social history                                                                                                           | Medical history                                                                                                                                                                                                                                    | EBV          | RPR | CMV | Hepatitis B | Hepatitis C | HIV |
|--------|-----|------|--------------------------------------|--------|--------|--------------------------------------------------------------------------------------------------------------------------|----------------------------------------------------------------------------------------------------------------------------------------------------------------------------------------------------------------------------------------------------|--------------|-----|-----|-------------|-------------|-----|
| M      | 78  | C    | Anoxia                               | 73"    | 244lb  | No ETOH, Tobacco or drug use                                                                                             | HTN x 10yrs, CAD, GI disease, black lungs.                                                                                                                                                                                                         | Not reported | Neg | Pos | Neg         | Neg         | Neg |
| M      | 60  | C    | CVA/Stroke                           | 70"    | 90 Kg  | ETOH: Occasional in the last 5 yrs, 1 glass wine or cocktail 2x/week, also mos without drinking; no tobacco or drug use. | Partial right lung lobectomy 7 yrs ago - streptococcus, recent ear infection, flu shot, recent levoquin for possible positive blood culture. Meds: Amoxicillin                                                                                     | Not reported | Neg | Pos | Neg         | Neg         | Neg |
| M      | 45  | C    | CVA 2nd to ICH                       | 5'9"   | 220lb  | No ETOH; Tobacco: 1 -1 1/2 PPD x 28 yrs; Drugs: poss Marijuana use as per historian, unk amt, frequency, duration        | HTN dx 1yr ago - unk if compliant w/ meds. Meds: Tylenol Cold/Sinus, Antacids                                                                                                                                                                      | Neg          | Neg | Neg | Neg         | Neg         | Neg |
| M      | 51  | C    | CVA; 2nd to ICH                      | 5'10"  | 192 lb | ETOH: 4 cases beer per wk x19 yrs; Tobacco: 2 ppd x 30 yrs; no drug use                                                  | Coronary Artery Disease - stents placed 2 yrs ago, Hypertension x2yrs - non-compliant, recent kidney issues - dehydration due to pancreatitis, dialysis 1X earlier this year. Meds: Meds for Hypertension & Plavix - recently stopped taking meds. | IgG+         | Neg | Pos | Neg         | Neg         | Neg |
| M      | 50  | C    | ICH                                  | 71"    | 109Kg  | ETOH: Alcohol Abuse; No tobacco or drugs                                                                                 | HTN. Meds: none noted                                                                                                                                                                                                                              | Pos          | Neg | Pos | Neg         | Neg         | Neg |
| M      | 24  | C    | Anoxia; 2nd to Stroke                | 72"    | 129Kg  | ETOH: socially; Tobacco: 1 -2 cig occasionally; no drug use.                                                             | Valve replacement. Meds: Coumadin                                                                                                                                                                                                                  | Not reported | Neg | Pos | Neg         | Neg         | Neg |
| M      | 56  | C    | Head Trauma; 2nd to fell down stairs | 70"    | 160lb  | ETOH: 2-3 beers/day; Tobacco: 1ppd x 26 yrs; no drug use                                                                 | High Cholesterol, High Blood Pressure, recent Bypass-Groin; Meds: Plavix, Fish Oil, Cholesterol meds                                                                                                                                               | Not reported | Neg | Neg | Neg         | Neg         | Neg |

**Caution:** This product was prepared from fresh human tissue. Treat all products containing human-derived materials as potentially infectious, as no known test methods can offer assurance that products derived from human tissues will not transmit infectious agents.

These products are for research use only. Do not use in animals or humans. These products have not been approved for any diagnostic or clinical procedures.

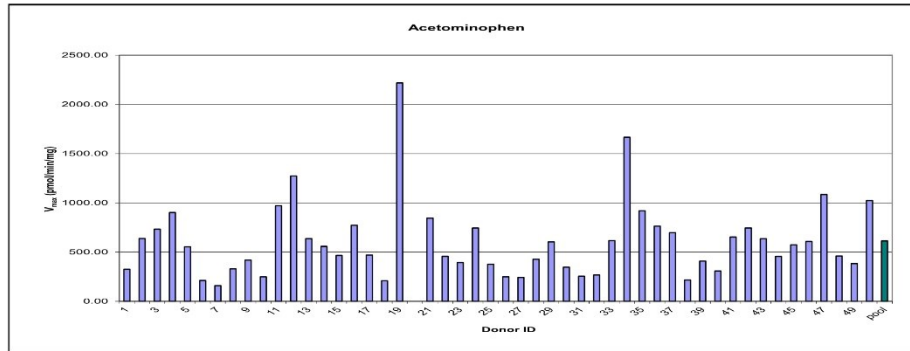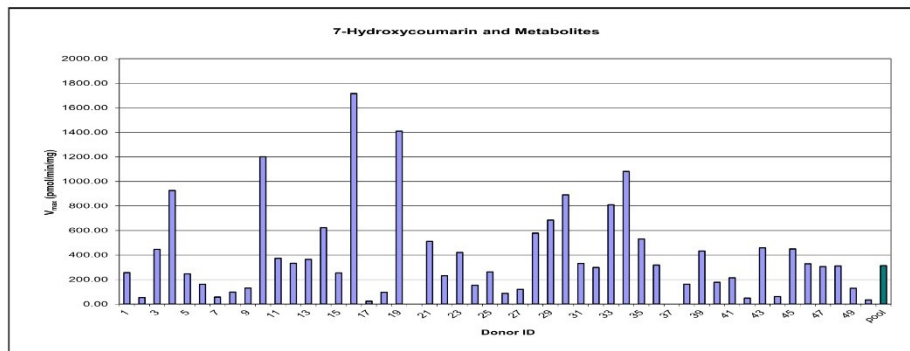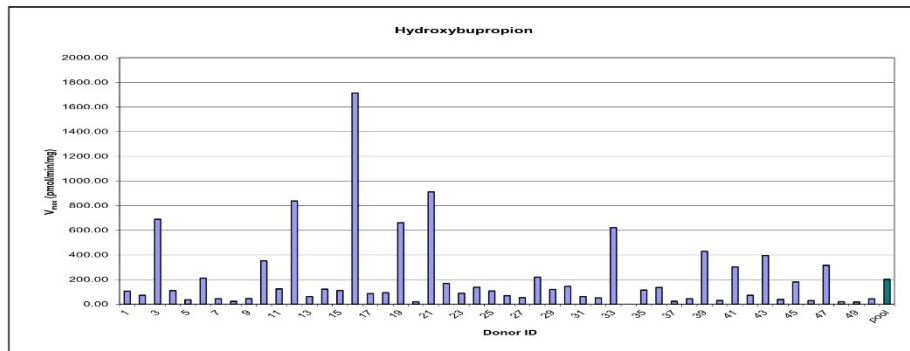

**Caution:** This product was prepared from fresh human tissue. Treat all products containing human-derived materials as potentially infectious, as no known test methods can offer assurance that products derived from human tissues will not transmit infectious agents.

These products are for research use only. Do not use in animals or humans. These products have not been approved for any diagnostic or clinical procedures.

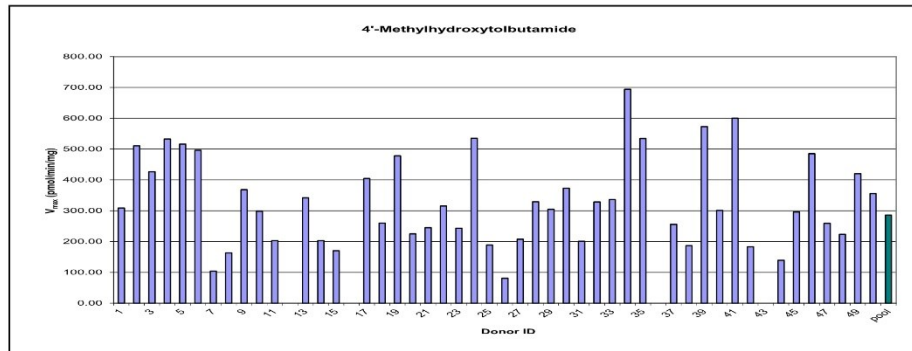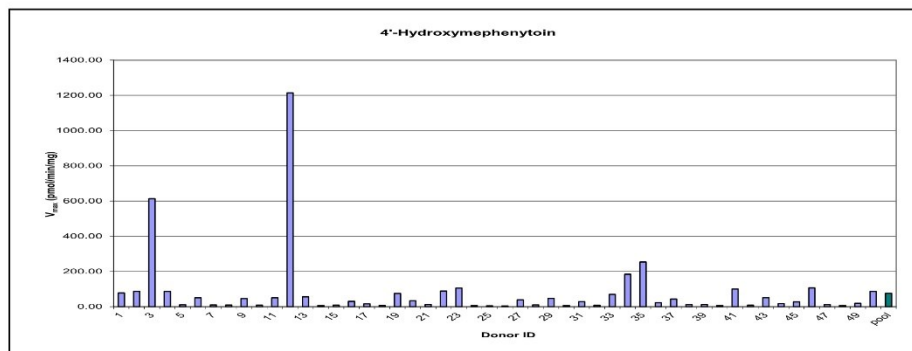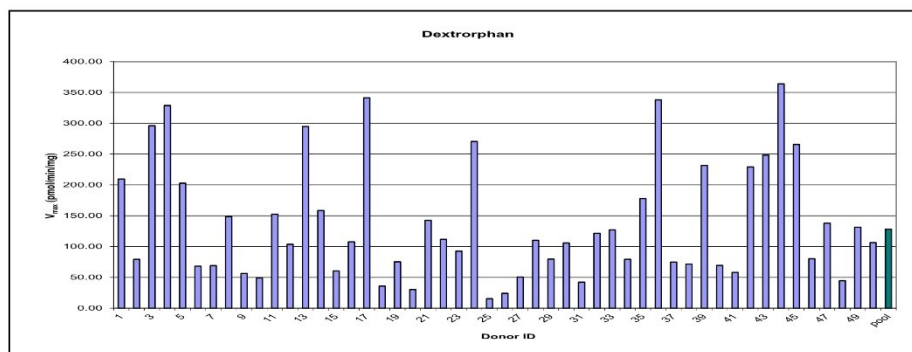

**Caution:** This product was prepared from fresh human tissue. Treat all products containing human-derived materials as potentially infectious, as no known test methods can offer assurance that products derived from human tissues will not transmit infectious agents.

These products are for research use only. Do not use in animals or humans. These products have not been approved for any diagnostic or clinical procedures.

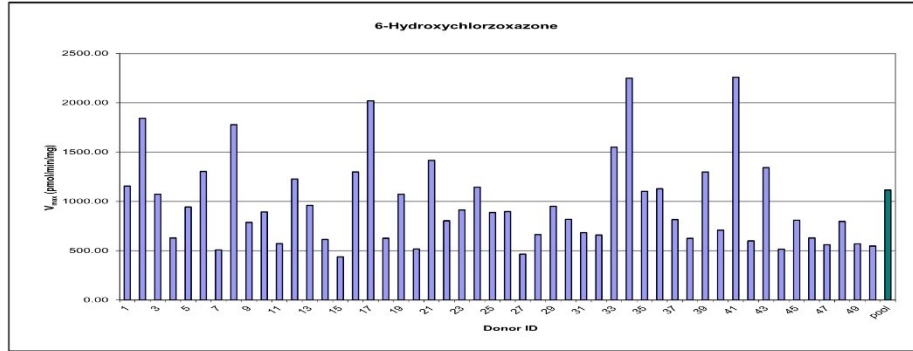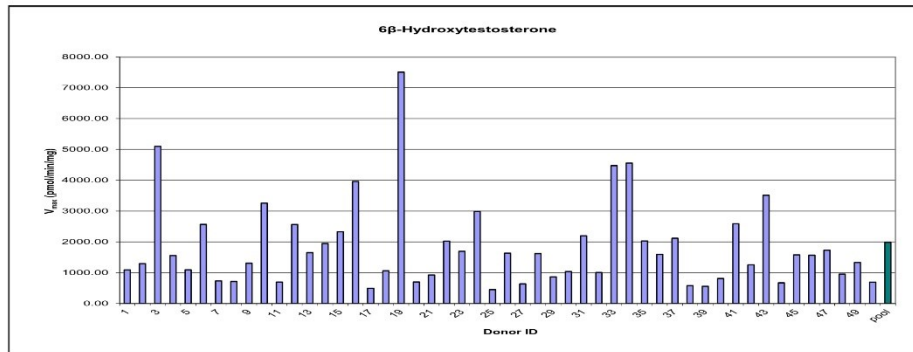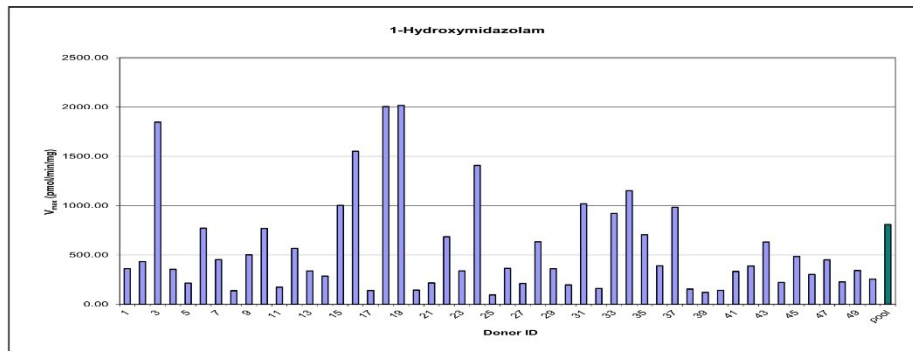

**Caution:** This product was prepared from fresh human tissue. Treat all products containing human-derived materials as potentially infectious, as no known test methods can offer assurance that products derived from human tissues will not transmit infectious agents.

These products are for research use only. Do not use in animals or humans. These products have not been approved for any diagnostic or clinical procedures.

## S2 Gene test report of HepG2 cells used in this study.

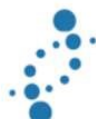

GENETIC TESTING BIOTECHNOLOGY

### Cell Line Authentication Service STR Profile Report

**Sample Submitted By:** Dr. Guangbo Ge  
Shanghai University of Traditional Chinese Medicine  
**Email Address:** geguangbo@dicp.ac.cn  
**Sales Order:** 190313C  
**Cell Line Designation:** HepG2  
**Date Sample Received:** Mar 13<sup>th</sup>, 2019  
**Report Date:** Mar 14<sup>th</sup>, 2019

**Methodology:** Nineteen short tandem repeat (STR) loci plus the gender determining locus, Amelogenin, were amplified using the commercially available EX20 Kit from AGCU. The cell line sample was processed using the ABI Prism® 3130 XL Genetic Analyzer. Data were analyzed using GeneMapper® ID v3.2 software (Applied Biosystems). Appropriate positive and negative controls were run and confirmed for each sample submitted.

**Data Interpretation:** Cell lines were authenticated using Short Tandem Repeat (STR) analysis as described in 2012 in ANSI Standard (ASN-0002) by the ATCC Standards Development Organization (SDO) and in Capes-Davis et al., Match criteria for human cell line authentication: Where do we draw the line? Int J Cancer. 2013;132(11):2510-9.

**GTB™ performs STR Profiling following ISO 9001:2008 and ISO/IEC 17025:2005 quality standards.**

There are no warranties with respect to the services or results supplied, express or implied, including, without limitation, any implied warranty of merchantability or fitness for a particular purpose. Genetic Testing Biotechnology (GTB) is not liable for any damages or injuries resulting from receipt and/or improper, inappropriate, negligent or other wrongful use of the test results supplied, and/or from misidentification, misrepresentation, or lack of accuracy of those results. Your exclusive remedy against GTB and those supplying materials used in the services for any losses or damage of any kind whatsoever, whether in contract, tort, or otherwise, shall be, at GTB's option, refund of the fee paid for such service or repeat of the service.

**NOTE: According to the recommendations of *IJC* on cell line authentication, the report is valid for four years since the issue date.**

---

Technical Questions?  
GTB Technical Support  
+86-512-67486171  
service@jsdna.org  
Section 505, Yixin BLD  
SIP, Suzhou, 215123  
Jiangsu, P.R. China

---

Ordering Questions?  
order@jsdna.org  
GTB Corporation  
+86-512-62806339  
Section 303, Yixin BLD  
SIP, Suzhou, 215123  
Jiangsu, P.R. China

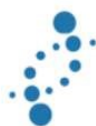

GENETIC TESTING BIOTECHNOLOGY

## Cell Line Authentication Service STR Profile Report

Sales Order: 190313C

| Test Results for Submitted Sample |                      |       | DSMZ Reference Database Profile |    |
|-----------------------------------|----------------------|-------|---------------------------------|----|
| Loci                              | Query Profile: HepG2 |       | Database Profile: HepG2         |    |
| Amelogenin                        | X                    | Y     | X                               | Y  |
| D3S1358                           | 15                   | 16    |                                 |    |
| D13S317                           | 9                    | 13    | 9                               | 13 |
| D7S820                            | 10                   |       | 10                              |    |
| D16S539                           | 12                   |       | 12                              | 13 |
| Penta E                           | 15                   | 20    |                                 |    |
| TPOX                              | 8                    | 9     | 8                               | 9  |
| TH01                              | 9                    |       | 9                               |    |
| D2S1338                           | 19                   | 20    |                                 |    |
| CSF1PO                            | 10                   | 11    | 10                              | 11 |
| Penta D                           | 9                    | 13    |                                 |    |
| D19S433                           | 15.2                 |       |                                 |    |
| vWA                               | 17                   |       | 17                              |    |
| D21S11                            | 29                   | 30 31 |                                 |    |
| D18S51                            | 13                   | 14    |                                 |    |
| D6S1043                           | 13                   |       |                                 |    |
| D8S1179                           | 15                   | 16    |                                 |    |
| D5S818                            | 11                   | 12    | 11                              | 12 |
| D12S391                           | 21                   | 25    |                                 |    |
| FGA                               | 22                   | 25    |                                 |    |

The allele match algorithm compares the 8 core loci plus amelogenin only, even though alleles from all loci will be reported when available.

Note: Loci highlighted in grey (8 core STR loci plus Amelogenin) can be made public to verify cell identity. In order to protect the identity of the donor, **please do not publish** the allele calls from all the STR loci tested.

### Explanation of Test Results

Cell lines with  $\geq 80\%$  match are considered to be related; i.e., derived from a common ancestry. Cell lines with between a 55% to 80% match require further profiling for authentication of relatedness.

- ☐ The submitted sample profile is human, but not a match for any profile in the DSMZ STR database.
- ☐ The submitted profile is an exact match for the following human cell line(s) in the DSMZ STR database (8 core loci plus Amelogenin):
- ☒ The submitted profile is similar to the following DSMZ human cell line(s): HepG2 (94% match)

e-Signature Technician:

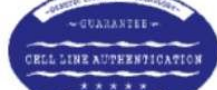

Digitally signed by Faye Wong  
DN: cn=Faye Wong, o=Genetic Testing Biotechnology  
(Suzhou), ou=DNA Typing Section,  
email=order@jsdna.org, c=CN  
Date: 2019.03.14 09:51:58 +08'00'

e-Signature Reviewer:

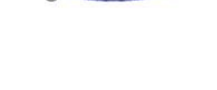

Digitally signed by Alan Cui  
DN: cn=Alan Cui, o=Genetic Testing Biotechnology  
(Suzhou), ou=Supervision Section,  
email=service@jsdna.org, c=CN  
Date: 2019.03.14 09:52:34 +08'00'

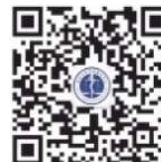

More information

**Addendum:** Electropherogram for the customer's sample set 1 of 1

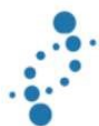

GENETIC TESTING BIOTECHNOLOGY

## Cell Line Authentication Service STR Profile Report

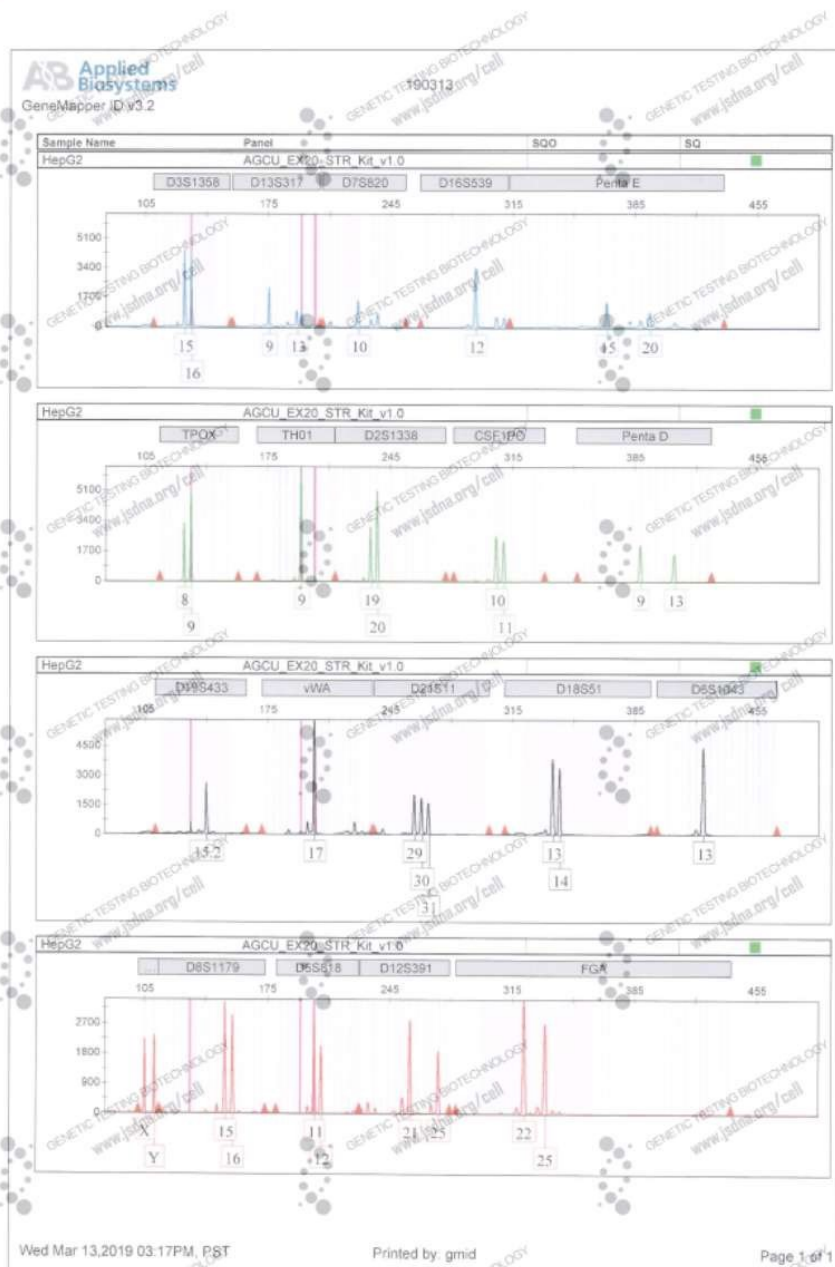

Supplement: d0fo02140g1.pdf [file d0fo02140g1.pdf]
